# Supplementary material
Source: PubMed Central journal article supplement (PMC2427324)
Supplement: M800917200_1.pdf [file M800917200_1.pdf]

Supplementary Fig. 1. Specificities of Csk and Chk antibodies.

A. GST fusion proteins conjugated with Csk and Chk were loaded in the left and right lane of the gel, respectively. B. the lanes (left to right) of the gel were loaded with adult brain lysates of wild type (+/+) and Csk<sup>+/-</sup> mice, respectively. C. the lanes (left to right) of the gel were loaded with lysates of Csk<sup>-/-</sup> fibroblasts transfected with 0, 15, 40 $\mu$ g of Csk cDNA, respectively. D. the lanes (left to right) of the gel were loaded with lysates of brain and liver of adult rats, respectively. The filters were sequentially stripped and probed with antibodies as indicated next to the arrow. Csk (m): mouse Csk antibody; Csk (r): rabbit Csk antibody. Numbers to the left of the blots indicate the position and size (KDa) of molecular mass markers.

Supplementary Fig. 2. Csk associates with the NR2A and NR2B subunits

A. The gel (left) was loaded with lysates of HEK293 cells overexpressing NR2A with or without v-Src, and the gel (right) was loaded with Csk immunoprecipitates from the lysates. B. the gel (left) was loaded with lysates of HEK293 cells co-transfected with cDNAs of NR2B, Csk and active Src (Y527F) or inactive Src (Y527F/K295R), and the gel (right) was loaded with non-selective-IgG and NR2B immunoprecipitates from the lysates. The filter was then stripped and probed with antibodies as indicated next to the arrows. Numbers to the left of the blots indicate the position and size (KDa) of molecular mass markers.
